# Supplementary material for: Community health workers fostering trust and engagement in a community-based intervention for depressive older adults in Peru: a qualitative study
Source: Research Square preprint supplement (doi:10.21203/rs.3.rs-7665993/v1), 2025-10-19
Supplement: Supplementary file 1 [file 6ea643d548419b058b1b4a76.pdf]

## Post-Phase 2 Interview Guide Community Health Worker

**Interviewer:** *“Let's remember the process, there was an informative meeting, then a general training with about 30 participants. After that there was a training with more dynamics, role playings and a smaller group. Around May the attentions began and you experienced and saw your colleagues bring their sessions to the supervision meetings. At this point, you have already completed your first VIDACTIVA intervention with an older adult...”*

1. How would you say your experience has been in all this time? (explore learning and changes, moments in time, personal and family impacts).
2. How did it go with the older adult user?
  - a. Bond-relationship
  - b. User and Self Process (Impacts)
  - c. Difficulties and advantages with what the program requires.
  - d. Difficulties with the location for the meetings, people around (family), interruptions, etc.
3. What helps the user to engage the most with the program?
4. For you, what is it like to do the problem-solving exercises with users? What would you say about the programming of pleasurable, physical and social activities? And what would you say about psychoeducation?
5. For you, is it possible to find users interested in the program? Coordinate appointments? Do the home visits?
6. For you, is it possible not to visit or contact the user between visits? And when is it a week? And when is it two weeks? And when is it a month?
7. How would you like the program best? (what would you remove, what would you add, what "hinders" you or seems unnecessary, etc.)
8. If you had to tell a Government Public Health authority about the program, how would you describe it? If they asked you about what you would need to develop the program on your own, or within your community, What would you say?
9. Do you think other Community Health Workers might be interested in the program? Would they agree to do what you are doing in the program?
10. How has the Community Health Workers group process been in all this time? (explore collective learning, organization, participation)
11. What is your opinion about the relationship that was forged within the Community Health Workers group during the sessions? (The Team-Couple, the Vidactiva research team and full group)
12. How important for you (and why) is:
  - a. The certificate for participating in the program
  - b. "The 15 soles (\$ 5.00)" for attending the meetings
  - c. "The 15 soles (\$ 5.00)" for each session with the user
  - d. That VIDACTIVA sessions are done by Community Health Workers
  - e. The problem-solving exercises
  - f. The programming of pleasurable, physical and social activities
  - g. The psychoeducation with the users and their family
  - h. The PHQ-9
